# Supplementary material
Source: PubMed Central journal article supplement (PMC3127557)
Supplement: supp_86.7.615_SupplementalTables.pdf [file supp_86.7.615_SupplementalTables.pdf]

## Supporting Online Material

Tanenberg RJ, Irving GA, Risser RC, Ahl J, Robinson MJ, Skljarevski V, Malcom SK. Duloxetine, Pregabalin, and Duloxetine Plus Gabapentin for Diabetic Peripheral Neuropathic Pain Management in Patients With Inadequate Pain Response to Gabapentin: An Open-Label, Randomized, Noninferiority Comparison. *Mayo Clin Proc.* 2011;86(7):615-624.

**TABLE 1.** Concomitant Use of TCAs and Opioids During the Study

**TABLE 2.** Per-Protocol Population and Reasons for Exclusion

**TABLE 3.** Noninferiority Results in Intent-To-Treat and Per-Protocol Patient Populations

**TABLE 4.** Subgroup Analysis of Mean Changes in Daily Pain at End Point in Patients Who Did or Did Not Use Concomitant Antidepressants or Pain Medications

This supplementary material has been peer reviewed and the authors confirm that data are accurate.

TABLE S1. **Concomitant Use of TCAs and Opioids During the Study**

| Variable                                | Group 1<br>Pregabalin (n=134) | Group 2<br>Duloxetine +<br>gabapentin (n=135) | Group 3<br>Duloxetine (n=138) | P values |        |        |
|-----------------------------------------|-------------------------------|-----------------------------------------------|-------------------------------|----------|--------|--------|
|                                         |                               |                                               |                               | 1 vs 2   | 1 vs 3 | 2 vs 3 |
| Any TCA                                 | 22 (16.4)                     | 5 (3.7)                                       | 11 (8.0)                      | <.001    | .04    | .20    |
| Amitriptyline                           | 17 (12.7)                     | 5 (3.7)                                       | 9 (6.5)                       | .01      | >.99   | .41    |
| Doxepin                                 | 3 (2.2)                       | 0                                             | 0                             | .12      | .12    | NA     |
| Nortriptyline                           | 1 (0.7)                       | 0                                             | 2 (1.4)                       | .50      | >.99   | .50    |
| Opipramol                               | 1 (0.7)                       | 0                                             | 0                             | .50      | .49    | NA     |
| Any opioid                              | 17 (12.7)                     | 21 (15.6)                                     | 19 (13.8)                     | .60      | .86    | .73    |
| Hydrocodone<br>bitartrate–acetaminophen | 4 (3.0)                       | 4 (3.0)                                       | 11 (8.0)                      | >.99     | .11    | .11    |
| Hydrocodone                             | 6 (4.5)                       | 4 (3.0)                                       | 2 (1.4)                       | .54      | .17    | .44    |
| Propoxyphene                            | 4 (3.0)                       | 2 (1.5)                                       | 1 (0.7)                       | .45      | .21    | .62    |
| Tramadol                                | 0                             | 4 (3.0)                                       | 2 (1.4)                       | .25      | .50    | .68    |
| Paracetamol–codeine                     | 2 (1.5)                       | 2 (1.5)                                       | 0                             | >.99     | .24    | .24    |
| Dextropropoxyphene                      | 0                             | 2 (1.5)                                       | 1 (0.7)                       | .50      | >.99   | .62    |
| Morphine                                | 0                             | 1 (0.7)                                       | 2 (1.4)                       | >.99     | .50    | >.99   |
| Oxycodone                               | 0                             | 2 (1.5)                                       | 1 (0.7)                       | .50      | >.99   | .62    |
| Oxycodone–acetaminophen                 | 1 (0.8)                       | 0                                             | 1 (0.7)                       | .50      | >.99   | >.99   |
| Pethidine                               | 0                             | 1 (0.7)                                       | 1 (0.7)                       | >.99     | >.99   | >.99   |
| Methadone                               | 0                             | 1 (0.7)                                       | 0                             | >.99     | NA     | .50    |
| Paracetamol–tramadol                    | 1 (0.8)                       | 0                                             | 0                             | .50      | .49    | NA     |
| Tilidine                                | 0                             | 1 (0.7)                                       | 0                             | >.99     | NA     | .50    |

Data are provided as number (percentage) of patients. *P* values are from the Fisher exact test. NA = not applicable; TCA = tricyclic antidepressant.

TABLE S2. **Per-Protocol Population and Reasons for Exclusion<sup>a</sup>**

| Variable                                         | Pregabalin    | Duloxetine + gabapentin | Duloxetine                 |
|--------------------------------------------------|---------------|-------------------------|----------------------------|
| Per-protocol population                          | 97/134 (72.4) | 105/135 (77.8)          | 79/138 (57.2)              |
| Excluded from per-protocol group                 | 37/134 (27.6) | 30/135 (22.2)           | 59/138 (42.8) <sup>b</sup> |
| Reasons for exclusions                           |               |                         |                            |
| Nonadherence to study drug therapy               | 35/37 (94.6)  | 30/30 (100)             | 55/59 (93.2)               |
| MNSI score <3 at entry                           | 2/37 (5.4)    | 0                       | 3/59 (5.1)                 |
| Gabapentin taper ≥14 d                           | 1/37 (2.7)    | 0                       | 2/59 (3.4)                 |
| Use of prohibited medication                     | 2/37 (5.4)    | 0                       | 1/59 (1.7)                 |
| HbA <sub>1c</sub> level >12% after randomization | 0             | 0                       | 1/59 (1.7)                 |

<sup>a</sup> Data are provided as number (percentage) of patients. HbA<sub>1c</sub> = glycated hemoglobin; MNSI = Michigan Neuropathy Screening Instrument.

<sup>b</sup> Significantly greater than pregabalin (*P*=.02) and duloxetine + gabapentin (*P*=.01).

TABLE S3. **Noninferiority<sup>a</sup> Results in Intent-To-Treat and Per-Protocol Patient Populations**

| Population                                   | Analysis          | Mean difference (95% CI) |
|----------------------------------------------|-------------------|--------------------------|
| <u>Duloxetine vs pregabalin</u>              |                   |                          |
| Intent-to-Treat                              | MMRM <sup>b</sup> | 0.49 (–0.05 to 1.04)     |
|                                              | LOCF              | 0.46 (–0.06 to 0.98)     |
|                                              | BOCF              | –0.09 (–0.58 to 0.39)    |
| Per-Protocol                                 | MMRM              | 0.46 (–0.20 to 1.13)     |
|                                              | LOCF              | 0.42 (–0.24 to 1.07)     |
|                                              | BOCF              | –0.08 (–0.71 to 0.54)    |
| <u>Duloxetine vs duloxetine + gabapentin</u> |                   |                          |
| Intent-to-Treat                              | MMRM <sup>c</sup> | 0.23 (–0.32 to 0.78)     |
|                                              | LOCF              | 0.15 (–0.37 to 0.68)     |
|                                              | BOCF              | –0.25 (–0.74 to 0.23)    |
| Per-Protocol                                 | MMRM              | 0.18 (–0.49 to 0.85)     |
|                                              | LOCF              | 0.29 (–0.36 to 0.93)     |
|                                              | BOCF              | –0.08 (–0.68 to 0.53)    |

<sup>a</sup> The prespecified and fixed margin of inferiority (MoNI) of –0.80 was used for each comparison. Except for the primary and secondary objectives specified, all of the results are secondary analyses. Baseline observation carried forward (BOCF) was post hoc. CI = confidence interval; LOCF = last observation carried forward; MMRM = mixed model repeated measures.

<sup>b</sup> Primary objective.

<sup>c</sup> Secondary objective.

TABLE S4. **Subgroup Analysis of Mean Changes in Daily Pain at End Point in Patients Who Did or Did Not Use Concomitant Antidepressants or Pain Medications**

| Variable                         | Group 1<br>Pregabalin |           | Group 2<br>Duloxetine + gabapentin |           | Group 3<br>Duloxetine |           | P values |        |        | Test of 3-way<br>interaction<br>P value |
|----------------------------------|-----------------------|-----------|------------------------------------|-----------|-----------------------|-----------|----------|--------|--------|-----------------------------------------|
|                                  | No.                   | Mean ± SD | No.                                | Mean ± SD | No.                   | Mean ± SD | 1 vs 2   | 1 vs 3 | 2 vs 3 |                                         |
| Antidepressant user              | 27                    | –2.3±0.4  | 13                                 | –2.2±0.5  | 17                    | –2.1±0.5  | .79      | .75    | .97    | .04                                     |
| Antidepressant nonuser           | 66                    | –2.1±0.2  | 73                                 | –2.4±0.2  | 60                    | –2.8±0.2  | .22      | .03    | .31    |                                         |
| Pain medication user             | 64                    | –2.1±0.2  | 49                                 | –2.5±0.3  | 51                    | –2.8±0.3  | .27      | .03    | .31    | .70                                     |
| Pain medication nonuser          | 29                    | –2.2±0.3  | 37                                 | –2.3±0.3  | 26                    | –2.2±0.4  | .78      | .94    | .84    |                                         |
| Opioid user                      | 11                    | –1.3 ±0.6 | 15                                 | –2.2±0.5  | 13                    | –1.9±0.5  | .23      | .43    | .69    | .36                                     |
| Opioid nonuser                   | 82                    | –2.3±0.2  | 71                                 | –2.4±0.2  | 64                    | –2.8±0.2  | .51      | .09    | .30    |                                         |
| Tricyclic antidepressant user    | 19                    | –1.8±0.5  | 3                                  | –2.7±1.2  | 7                     | –2.5±0.7  | .48      | .41    | .90    | .52                                     |
| Tricyclic antidepressant nonuser | 74                    | –2.2±0.2  | 83                                 | –2.4±0.2  | 70                    | –2.6±0.2  | .51      | .14    | .39    |                                         |
